# Supplementary material for: Glacial-interglacial contrasts in the marine inorganic carbon chemistry of the Benguela Upwelling System
Source: Copernicus journal article supplement (doi:10.5194/egusphere-2024-1915), 2024-07-04
Supplement: Supplementary file 1 [file egusphere-2024-1915-supplement.pdf]

*Supplement of*

## **Glacial-interglacial contrasts in the marine inorganic carbon chemistry of the Benguela Upwelling System**

Szabina Karancz<sup>1</sup>; Lennart J. de Nooijer<sup>1</sup>; Bas van der Wagt<sup>1</sup>; Marcel T. J. van der Meer<sup>2</sup>, Sambuddha Misra<sup>3</sup>; Rick Hennekam<sup>1</sup>; Zeynep Erdem<sup>2</sup>; Julie Lattaud<sup>4</sup>; Negar Haghypour<sup>5,6</sup>; Stefan Schouten<sup>2,7</sup>; Gert-Jan Reichart<sup>1,7</sup>

<sup>1</sup> Department of Ocean Systems, NIOZ Royal Netherlands Institute for Sea Research, Texel, The Netherlands

<sup>2</sup> Department of Marine Microbiology and Biogeochemistry, NIOZ Royal Netherlands Institute for Sea Research, Texel, The Netherlands

<sup>3</sup> Centre for Earth Sciences, Indian Institute of Science, Bangalore, India

<sup>4</sup> Department of Environmental Sciences, University of Basel, Basel, Switzerland

<sup>5</sup> Geological Institute, Department of Earth Sciences, ETH Zürich, Zürich, Switzerland

<sup>6</sup> Laboratory of Ion Beam Physics, ETH Zürich, Zürich, Switzerland

<sup>7</sup> Department of Earth Sciences, Faculty of Geosciences, Utrecht University, Utrecht, The Netherlands

*Correspondence to: Szabina Karancz ([szabina.karancz@nioz.nl](mailto:szabina.karancz@nioz.nl))*

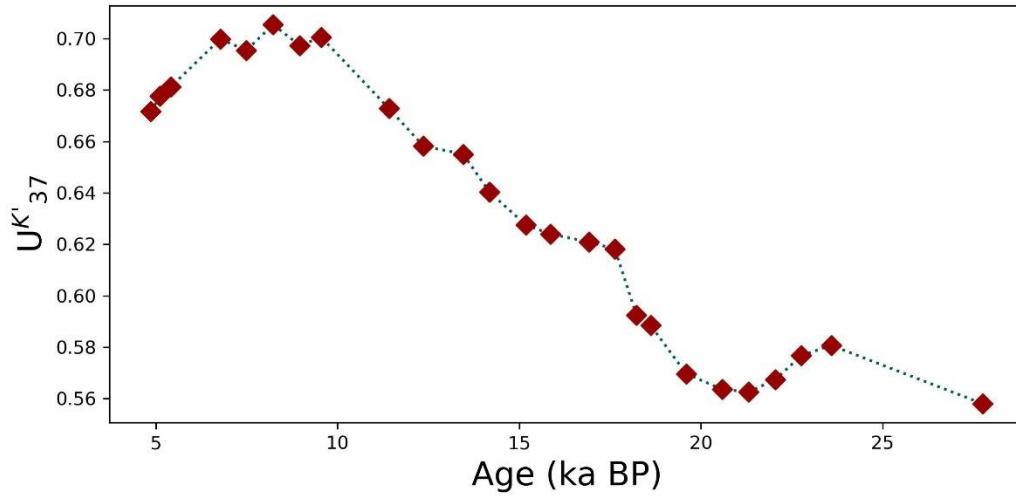

**Figure S1.** Ketone unsaturation index ( $U^{K'}_{37} = C_{37:2} / (C_{37:3} + C_{37:2})$ ; Prahl and Wakeham, 1987) plotted over the past 27 ka BP.

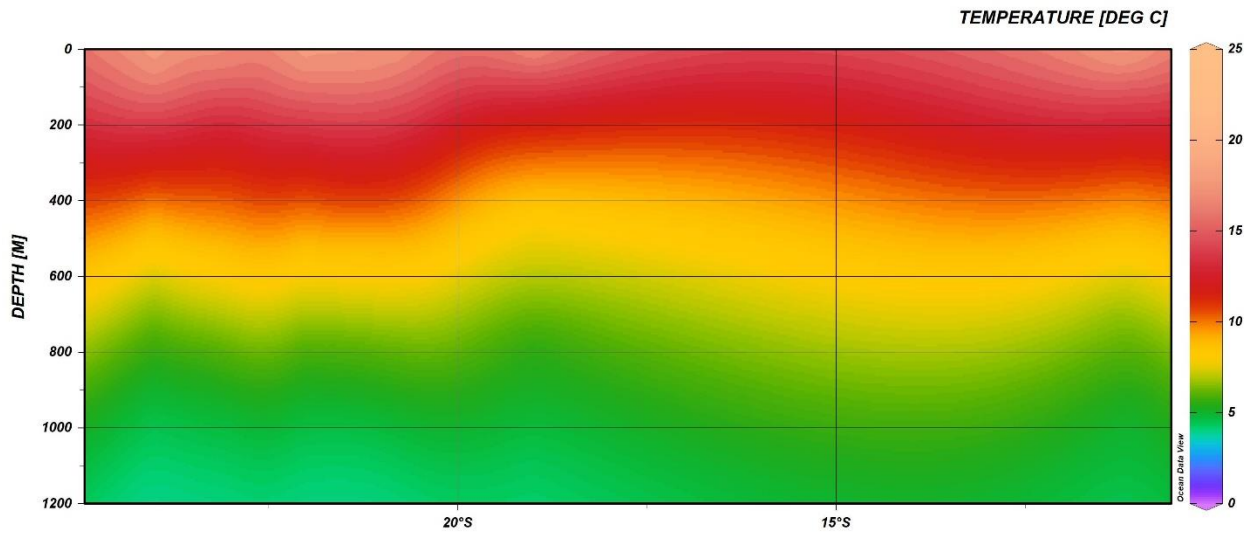

**Figure S2.** Depth transect in the northern Benguela Upwelling System showing temperature distribution. Temperature values are obtained from GLODAPv2023 (Lauvset et al., 2024).

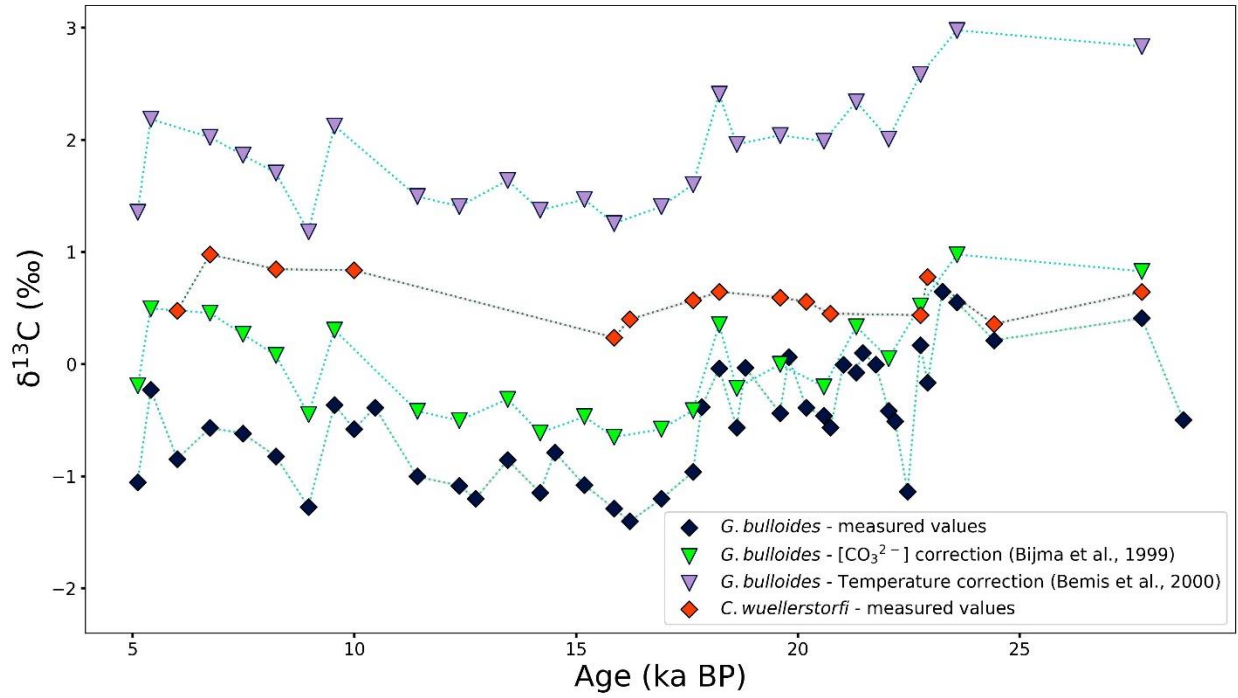

**Figure S3.** Measured  $\delta^{13}\text{C}$  values of *G. bulloides* (dark blue diamonds), and *C. wuellerstorfi* (red diamonds), and  $\delta^{13}\text{C}$  values of *G. bulloides* corrected for temperature (purple triangles; Bemis et al., 2000) and  $[\text{CO}_3^{2-}]$  (green triangles; Bijma et al., 1999) plotted over the past 27 ka BP.

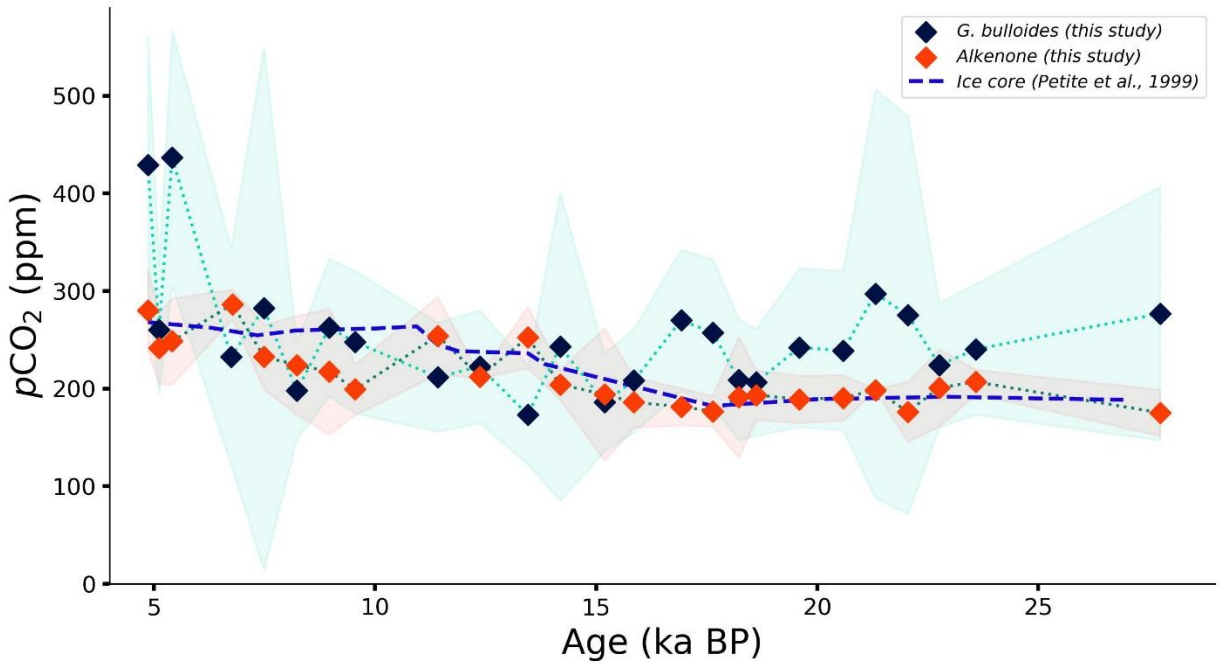

**Figure S4.** Reconstruction of  $p\text{CO}_2$  based on foraminiferal (*G. bulloides*)  $\delta^{11}\text{B}$  values combined with B/Ca values using the calibration of Krupinski et al. (2017; dark blue diamonds) compared to the  $p\text{CO}_2$  reconstruction based on  $\delta^{13}\text{C}$  of alkenones (red diamonds) and ice core record of  $p\text{CO}_2$  (blue dashed line; Petite et al., 1999). Light green and red shaded area represent propagated error for the foraminifera and alkenone based reconstructions, respectively.

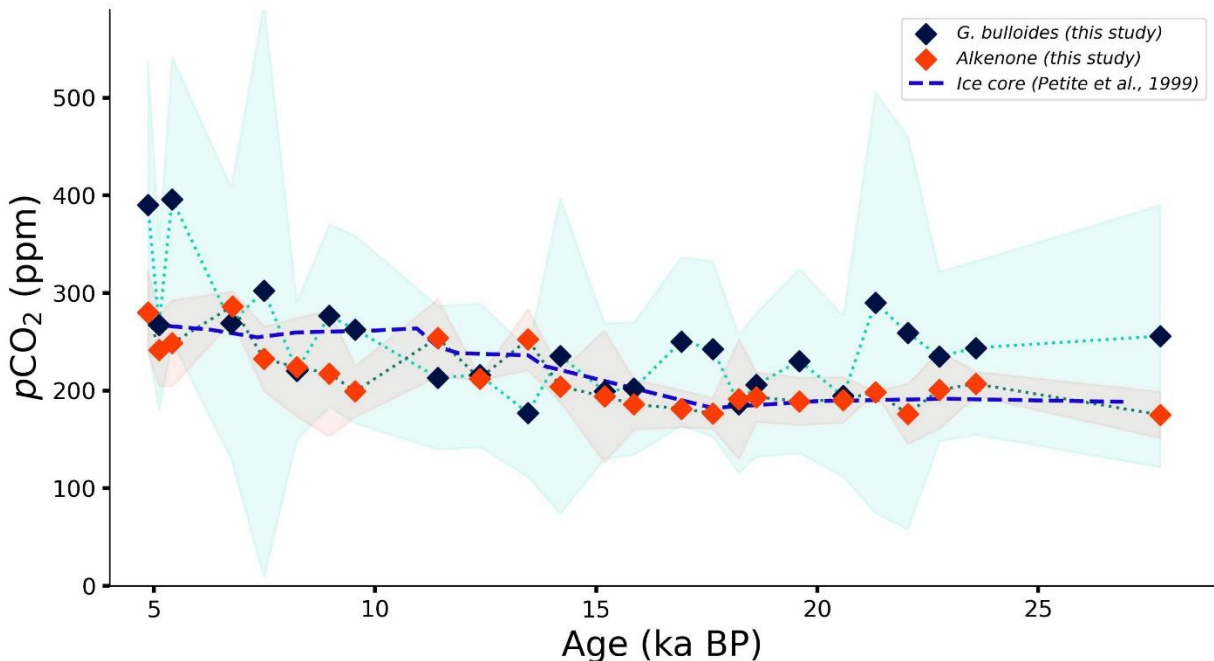

**Figure S5.** Reconstruction of  $p\text{CO}_2$  based on foraminiferal (*G. bulloides*)  $\delta^{11}\text{B}$  values combined with S/Mg values using the calibration of Karancz et al. (2024; dark blue diamonds) compared to the  $p\text{CO}_2$  reconstruction based on  $\delta^{13}\text{C}$  of alkenones (red diamonds) and ice core record of  $p\text{CO}_2$  (blue dashed line; Petite et al., 1999). Light green and red shaded area represent propagated error for the foraminifera and alkenone based reconstructions, respectively.

### Text S1: Non-traditional methods for $p\text{CO}_2$ reconstruction

Using the core-top calibration of Krupinski et al. (2017),  $[\text{CO}_3^{2-}]$  was calculated for each sample based on B/Ca ratios, and subsequently used together with the pH values to reconstruct  $p\text{CO}_2$  (Supplementary Figure S4). The difference between the alkenone- and foraminifera-based reconstructions is somewhat reduced when B/Ca is applied instead of total alkalinity. However, because of error propagation, the uncertainty interval increases. Except for two Holocene intervals that show higher values, calculated  $p\text{CO}_2$  is generally lowered by 26-79 ppm, making the  $\delta^{11}\text{B}$  record more similar to the alkenone  $\delta^{13}\text{C}$  based  $p\text{CO}_2$  reconstruction. Still, reconstructed  $p\text{CO}_2$  values during the LGM and early deglacial are consistently higher than the atmospheric values.

Application of S/Mg may provide an alternative for B/Ca based reconstructions as this proxy may correct for multiple effects, such as temperature, pH, growth rate, enhancing the predictive power for  $[\text{CO}_3^{2-}]$  (Karancz et al., 2024). Using  $[\text{CO}_3^{2-}]$  reconstructed based on S/Mg instead of B/Ca, on average further reduces the difference between the foraminifera and alkenone based  $p\text{CO}_2$  values (Supplementary Figure S5).
